# Supplementary material for: Self-assembled dithiocarbamate–copper(ii) macrocycles for electrochemical anion recognition
Source: Royal Society of Chemistry journal article supplement (doi:10.1039/b007296f), 2001-01-01
Supplement: b007296f.doc [file b007296f.doc]

**Supporting Information**


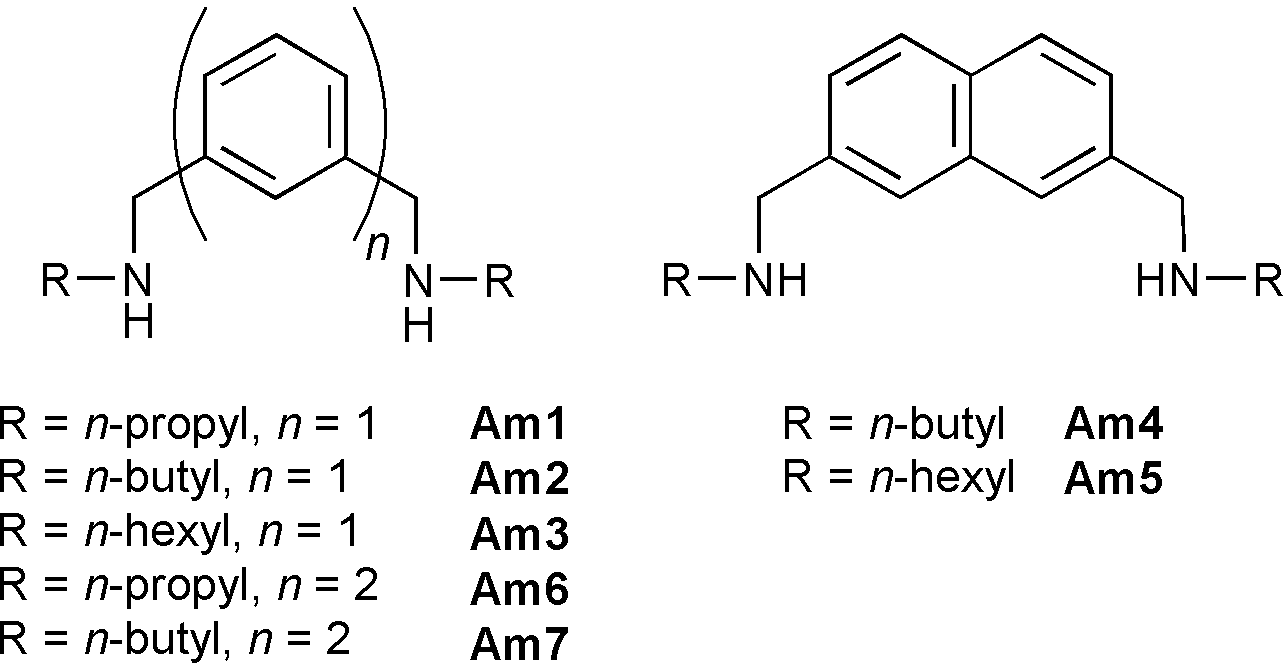


Diamine structures:

**Experimental**

#### General

*General procedure for the preparation of copper(II) complexes* **1**-**7**: To a solution of diamine in thf (25 cm3) and water (25 cm3) was added potassium hydroxide (2 equiv.) and carbon disulfide (2.2 equiv.) and the mixture stirred (1h) to give a pale yellow solution. Copper(II) acetate was added (2 equivalents) and the stirring continued (16h). The resulting brown precipitate was removed by filtration and recrystallised from a dichloromethane-ethanol mixture to afford the title compounds.

Xylyl-n-propyl **1**: Brown crystals (40 %); found: C 44.2, H 5.5, N 6.4% calc. for C32H44Cu2N4S8 C, 44.2, H 5.1, N 6.4; ES-MS (+ve): 891 [M+Na]+; ES-MS (oxid., CuOTf2): 434 [M]2+, 838 [M]+.

Xylyl-n-butyl **2**: Brown crystals (42 %); found: C 46.4, H 5.6, N 6.0% calc. for C32H44Cu2N4S8 C, 46.8, H 5.7, N 6.1; ES-MS (+ve): 947 [M+Na]+; ES-MS (oxid., CuOTf2): 462 [M]2+, 924 [M]+.

Xylyl-n-hexyl **3**:Brown crystals (71 %);found: C 49.0, H 6.6, N 5.2% calc. for C44H68Cu2N4S8·0.5CH2Cl2 C 49.5, H 6.5, N 5.2; ES-MS (+ve): 1075 [MK]+; ES-MS (oxid., CuOTf2): 518 [M]2+, 1036 [M]+.

Naphthyl-n-butyl **4**:Brown crystals (65 %);found: C 46.6, H 5.1, N 4.9% calc. for C44H56Cu2N4S8·CHCl3 C 47.3, H 5.0, N 4.9; ES-MS (+ve): 1047 [MNa]+; ES-MS (oxid., CuOTf2): 512 [M]2+, 1024 [M]+.

Naphthyl-n-hexyl **5**:Brown crystals (70 %);found: C 50.5, H 5.2, N 4.1% calc. for C52H72Cu2N4S8·CHCl3, C 50.7 H 5.6, N 4.4; ES-MS (+ve): 1159 [MNa]+; ES-MS (oxid., CuOTf2): 568 [M]2+, 1136 [M]+.

Biphenyl-n-propyl **6**: Brown crystals (42 %);found: C 51.4, H 4.7, N 5.3% calc. for C44H52Cu2N4S8 C 51.8, H 5.1 N 5.5; ES-MS (+ve): 1043 [MNa]+; ES-MS (oxid., CuOTf2): 510 [M]2+, 1020 [M]+.

Biphenyl-n-butyl **7**: Brown crystals (64 %);found: C 53.1, H 5.9, N 5.4% calc. for C48H60Cu2N4S8 C 53.6, H 5.62, N 5.20; ES-MS (+ve): 1199 [MNa]+; ES-MS (oxid., CuOTf2): 538 [M]2+, 1076 [M]+.

**[Cu(III)2L12][FeCl4]2 C6H6 8** To a stirred solution of **1** (100 mg, 0.115 mmol) in chloroform (20 cm3) was added iron(III) chloride (40 mg, 2.4 mmol) in acetone (0.5 cm3). Benzene (25 cm3) was carefully layered onto the resultant green solution and after 3 days green crystals suitable for X-ray analysis had formed (44mg); found: C 33.3, H 3.6, N 4.0% calc. for [C32H44Cl8Cu2Fe2N4S8]C6H6 C 34.0, H 3.8, N 4.2.

The structure was solved using direct methods with the SHELX86 program.1 The non-hydrogen atoms were refined with anisotropic thermal parameters and the hydrogen atoms were included in geometric positions and given thermal parameters equivalent to 1.2 times those of the atom to which they were attached. The structure was refined on *F*2 using SHELXL2 to *R* values of (*R*1, *wR*2) for observed data 0.0578, 0.1590.

SHELX86, G. M. Sheldrick, *Acta Crystallogr., Sect. A*, 1990, **46**, 467.

1. SHELXL, G. M. Sheldrick, program for crystal structure refinement. University of Göttingen, 1993.
